# Supplementary material for: Continued increase of CFC-113a (CCl 3 CF 3 ) mixing ratios in the global atmosphere: emissions, occurrence and potential sources
Source: Copernicus journal article supplement (doi:10.5194/acp-18-4737-2018), 2018-04-09
Supplement: Supplementary file 2 [file acp-18-4737-2018-supplement.zip]

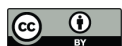

## *Supplement of*

# **Continued increase of CFC-113a ( $\text{CCl}_3\text{CF}_3$ ) mixing ratios in the global atmosphere: emissions, occurrence and potential sources**

**Karina E. Adcock et al.**

*Correspondence to:* Karina Adcock ([karina.adcock@uea.ac.uk](mailto:karina.adcock@uea.ac.uk))

- [acp-18-4737-2018-supplement-title-page.pdf](#)
- [supplementary material](#)
  - [supplementary material.pdf](#)
  - [supplementary material.xlsx](#)

The copyright of individual parts of the supplement might differ from the CC BY 4.0 License.
